# Supplementary material
Source: publisher site journal article supplement (https://www.dovepress.com/article/538891)
Supplement: Supplementary file 1 [file 538891%20Revised%20Supplementary%20Tables%201-5.docx]

Supplementary table 1. TRIPOD-SRMA Checklist for reporting systematic reviews of prediction model studies

| **Section and topic** | **Item No** | **Checklist item** | **Page** |
| --- | --- | --- | --- |
| **Title** |  |  |  |
| Title | 1 | Identify the report as a systematic review or meta-analysis (or both) of diagnostic or prognostic model studies. Specify the target population and outcome(s) predicted as relevant to the review question. | P1 |
| **Abstract** |  |  |  |
| Abstract | 2 | See the TRIPOD-SRMA Checklist for Abstracts | P2-3 |
| **Introduction** |  |  |  |
| Rationale | 3 | Describe the rationale for the review in the context of existing knowledge. | P3-4 |
| Objectives | 4 | Provide an explicit statement of the objective(s) being addressed with reference to: target population, index and comparator models (as relevant), outcome(s), time (prediction horizon and intended moment of using the model), and setting. | P4-5 |
| **Methods** |  |  |  |
| Study eligibility criteria | 5 | Specify study characteristics used as eligibility criteria, including any prediction models of specific interest, and whether development or validation studies (or both) were eligible. | P5-6 |
| Information sources | 6 | Specify all databases, registers, websites, organisations, reference lists and other sources searched or consulted to identify studies. Specify the date when each source was last searched or consulted. | P5-6 |
| Search strategy | 7 | Present the full search strategies for all databases, registers and websites, including any filters and limits used. | P5-6 |
| Study selection process | 8 | Specify the methods used to decide whether a study met the inclusion criteria of the review, including how many reviewers screened each record and each report retrieved, whether they worked independently, and if applicable, details of automation tools used in the process. | P7 |
| Data collection process | 9 | Specify the methods used to collect data from study reports, including how many reviewers collected data from each report, whether they worked independently, any processes for obtaining or confirming data from study investigators, and if applicable, details of automation tools used in the process. | P7 |
| Data Items | 10a | List and define all items for which data were sought from each study. | P7 |
| 10b | State the model performance measures that were sought (e.g., measures of calibration, discrimination, overall model fit, clinical utility). | P7 |
| 10c | Describe how any desired but unreported data items (items 10a, 10b) were handled (e.g., contacted authors, calculated from other reported information). | Not applicable |
| Risk of bias and applicability assessment | 11 | Specify the methods used to assess risk of bias in the included studies and their applicability to the review question. This should be done separately for each model development and validation. Include details of any tool(s) used, how many reviewers assessed each study and whether they worked independently. | P8 |
| Synthesis methods | 12a | Describe any methods for synthesising estimates of performance measures for each model. If meta-analysis was carried out, describe the methods used, including any transformations of data prior to pooling, how any heterogeneity in model performance was quantified and handled, and software package(s) used. | Not applicable |
| 12b | Describe any methods used to explore possible causes of heterogeneity in model performance (e.g., subgroup analysis, meta-regression), including whether or not they were planned. | Not applicable |
|  | 12c | Describe any sensitivity analyses conducted to assess robustness of the synthesised results. | Not applicable |
| Certainty assessment | 13 | Describe any methods used to assess certainty (or confidence) in the body of evidence for a prediction model. | Not applicable |
| **Results** |  |  |  |
| Study selection | 14 | Describe the results of the search and selection process, from the number of records identified in the search to the number of studies and models included in the review, ideally using a flow diagram. | P9, figure1 |
| Study and model  characteristics | 15 | Present study characteristics and model details extracted (as per Item 10a), and cite the study reports. | P9-10, table2 |
| Risk of bias and applicability | 16 | Present results of risk of bias and applicability assessment. This should be done separately for each model development and validation in each included study. | P11-12, table4 |
| Results of model performance in individual studies | 17 | Present performance estimates and confidence intervals for each model and all evaluations, including whether they relate to the internal or external validation performance. If internal, give details of the method. | P10-11, Table3 |
| Results of syntheses | 18a | Present the results of any synthesis of model performance, together with details of which study estimates contributed. If meta-analysis was carried out, then for each model and performance measure, present summary results, confidence/credible intervals and measures of heterogeneity. Forest plots may be useful. | Not applicable |
| 18b | For each model, present results of all investigations of possible causes of heterogeneity in model performance. | Not applicable |
| 18c | Present results of all sensitivity analyses conducted to assess the robustness of the synthesised results. | Not applicable |
| Certainty of evidence | 19 | Present any assessments of certainty (or confidence) in the body of evidence for each prediction model of interest. | Not applicable |
| **Discussion** |  |  |  |
| Summary of evidence | 20 | Summarise the main findings including the strengths and limitations of the evidence. | P13-18 |
| Limitations | 21 | Discuss the strengths and limitations of the review process. | P18 |
| Implications | 22 | Discuss implications of the results in the context of other evidence and for practice, policy, and future research. | P18 |
| **Other information** |  |  |  |
| Registration and protocol | 23a | Provide registration information for the review, including register name and registration number, or state that the review was not registered. | P5 |
| 23b | Indicate where the review protocol can be accessed, or state that a protocol was not prepared. | P5 |
| 23c | Describe and explain any amendments to information provided at registration or in the protocol. | Not applicable |
| Support | 24 | Describe sources of financial or non-financial support for the review, and the role of the funders or sponsors in the review. | P19 |
| Competing interests | 25 | Declare any competing interests of review authors. | P20 |
| Availability of data, code, and other materials | 26 | Report which of the following are publicly available and where they can be found: template data collection forms; data extracted from included studies; data used for all analyses; analytic code; any other materials used in the review. | P19-20 |

This checklist appears in appendix 2 of Snell KIE, Levis B, Damen JAA, et al. Transparent reporting of multivariable prediction models for individual prognosis or diagnosis: checklist for systematic reviews and meta-analyses (TRIPOD-SRMA). BMJ 2023;381:e073538. doi:10.1136/bmj-2022-073538.

Supplementary table 2. Search strategy

| Databases | Search terms | Number of records |
| --- | --- | --- |
| PubMed | #1 "perioperative period"[MeSH Terms] OR "Operative"[Title/Abstract] OR "intraoperative"[Title/Abstract] OR "postoperative"[Title/Abstract] OR "preoperative"[Title/Abstract]  #2((Hypothermia[MeSH Terms]) OR (Hypothermias[Title/Abstract] OR “Hypothermia, Accidental”[Title/Abstract] OR “Accidental Hypothermia”[Title/Abstract] OR “Accidental Hypothermias”[Title/Abstract] OR “Hypothermias, Accidental”[Title/Abstract])) OR (“unintended hypothermia”[Title/Abstract] OR “unplanned hypothermia”[Title/Abstract] OR “inadvertent hypothermia”[Title/Abstract] OR “body temperature declin*”[Title/Abstract] OR piloerection[Title/Abstract] OR shiver*[Title/Abstract])  #3 (validat* OR predict*.ti. OR rule*) OR (predict* AND (outcome* OR risk* OR model*)) OR ((history OR variable* OR criteria OR scor* OR characteristic* OR finding* OR factor*) AND (predict* OR model* OR decisions OR identif* OR prognos*)) OR (decision* AND (model* OR clinical* OR logistic models/)) OR (prognostic AND (history OR variable* OR criteria OR scor* OR characteristic* OR finding* OR factor* OR model*))  #4 (predict*[tiab] OR predictive value of tests [mh] OR scor* [tiab] OR observ* [tiab] OR observer variation [mh])  #5 "stratification"[All Fields] OR "ROC curve"[MeSH Terms] OR "discrimination"[All Fields] OR "discriminate"[All Fields] OR "c-statistic"[All Fields] OR "c-statistic"[All Fields] OR "area under the curve"[All Fields] OR "AUC"[All Fields] OR "calibration"[All Fields] OR "indices"[All Fields] OR "algorithm"[All Fields] OR "multivariable"[All Fields]  #6 #3 OR #4 OR #5  #7 #1 AND #2 AND #6 | 820 results |
| EMBASE | #1 'perioperative period'/exp OR 'operative':ab,ti OR 'intraoperative':ab,ti OR 'postoperative':ab,ti OR 'preoperative':ab,ti  #2 'hypothermia'/exp OR 'hypothermias':ab,ti OR 'hypothermia, accidental':ab,ti OR 'accidental hypothermia':ab,ti OR 'accidental hypothermias':ab,ti OR 'hypothermias, accidental':ab,ti OR 'unintended hypothermia':ab,ti OR 'unplanned hypothermia':ab,ti OR 'inadvertent hypothermia':ab,ti OR 'accidental hypothermia':ab,ti OR 'body temperature declin*':ab,ti OR 'piloerection':ab,ti  #3 'model':ab,ti OR 'predict*':ab,ti OR 'prognostic':ab,ti OR 'risk':ab,ti OR 'early warning':ab,ti  #4 #1 AND #2 AND #3 | 668 results |
| Cochrane Library | #1 Perioperative period OR (Operative ):ab,ti,kw OR (intraoperative ):ab,ti,kw OR (postoperative):ab,ti,kw OR (preoperative):ab,ti,kw  #2 Hypothermia OR ( Hypothermias ):ab,ti,kw OR (Hypothermia, Accidental ):ab,ti,kw OR (Accidental Hypothermia ):ab,ti,kw OR (Accidental Hypothermias ):ab,ti,kw OR (Hypothermias, Accidental):ab,ti,kw OR (unintended hypothermia ):ab,ti,kw OR (unplanned hypothermia ):ab,ti,kw OR (inadvertent hypothermia ):ab,ti,kw OR (accidental hypothermia):ab,ti,kw OR (body temperature declin* ):ab,ti,kw OR (piloerection ):ab,ti,kw OR (shiver*):ab,ti,kw  #3 (Model):ab,ti,kw OR (predict*):ab,ti,kw OR (prognostic ):ab,ti,kw OR (risk ):ab,ti,kw OR (early warning):ab,ti,kw  #4 #1 AND #2 AND #3 | 540 results |
| Web of Science | **#1 ((((TS=(Perioperative period)) OR TS=(Operative )) OR TS=(intraoperative )) OR TS=(postoperative )) OR TS=( preoperative)**  **#2 ((((((((((((TS=(Hypothermia)) OR TS=(Hypothermias )) OR TS=( Hypothermia, Accidental )) OR TS=( Accidental Hypothermia )) OR TS=( Accidental Hypothermias )) OR TS=( Hypothermias, Accidental )) OR TS=(unintended hypothermia )) OR TS=(unplanned hypothermia )) OR TS=( inadvertent hypothermia )) OR TS=( accidental hypothermia )) OR TS=(body temperature declin* )) OR TS=( piloerection )) OR TS=( shiver*)**  **#3 ((((TS=(Model )) OR TS=( predict* )) OR TS=( prognostic )) OR TS=( risk )) OR TS=( early warning)**  **#4 (((TS=(Construct* )) OR TS=( Appl* )) OR TS=(establish* )) OR TS=( validat*)**  **#5 #1 AND #2 AND #3 AND #4** | 815 results |
| CINAHL | **S1** **Perioperative period OR Operative OR intraoperative OR postoperative OR preoperative**  **S2 Hypothermia* OR Hypothermia*, Accidental OR Accidental* Hypothermia OR unintended hypothermia OR unplanned hypothermia OR inadvertent hypothermia OR accidental hypothermia OR body temperature declin* OR piloerection OR shiver***  **S3 Model OR predict* OR prognostic OR risk OR early warning**  **S4 S1 AND S2 AND S3** | 176 results |

**Notes:** Search terms in PubMed，Embase，Cochrane Library，Web of Science，and CINAHL are included below. All searches were conducted on May 23，2024.

Supplementary table 3. Basic characteristics of included studies (n=11)

| Study | Year | Country | Study Design | Study object | Measuring Instrument, Site, and Frequency | Number of Modelling |
| --- | --- | --- | --- | --- | --- | --- |
| Rincón et al.16 | 2008 | Colombia | Prospective cohort | Non-cardiac surgery patients under general/regional/combined anesthesia | Infrared tympanic thermometer; tympanic; recorded from the induction of anesthesia and every 5 min until the completion of surgery. | 2 |
| Yi et al.17 | 2017 | China | Retrospective cohort | Patients receiving general anesthesia | Infrared tympanic thermometer; tympanic; preoperative, intraoperative and postoperative measurements at 15 min intervals. | 1 |
| Kasai et al.18 | 2002 | Japan | Retrospective case-control study | Patients undergoing open abdominal surgery under general anesthesia | Thermocouple; tympanic; recorded every 5 min. | 1 |
| Desgranges et al.19 | 2017 | France | Prospective cohort | Cesarean delivery patients | Infrared tympanic thermometer; tympanic; maternal temperature was measured at three predefined time points: 1) on arrival in the operating room (before induction of anesthesia), 2) at skin incision, and 3) at the end of the skin suture. | 2 |
| Hu et al.20 | 2023 | China | Retrospective cohort | Patients undergoing robotic surgery | Disposable cord sensor; nasopharynx or distal esophagus; throughout the anesthesia, temperature data were automatically recorded at 5 min intervals. | 1 |
| Zhao et al.21 | 2023 | China | Prospective cohort | Total hip arthroplasty in elderly patients | Noninvasive wireless ear thermometer; tympanic; every 10 min during the operation. | 1 |
| Li et al.22 | 2023 | China | Prospective cohort | Patients undergoing joint replacement surgery | Ear thermometer; tympanic; The average body temperature three times before the operation, every 15 minutes during the operation and the recovery till the patient left the surgery suite. | 1 |
| Zhang et al.23 | 2023 | China | Retrospective cohort | Patients undergoing thoracoscopic pulmonary tumor surgery | Disposable temperature sensor probe; nasopharyngeal; continuously monitored during the operation and recorded every 1min. | 1 |
| Yuan et al.24 | 2024 | China | Retrospective cohort | Craniocerebral tumor resection in elderly patients | Monitor temperature sensor probe; nasopharyngeal; the patient’s body temperature was obtained from the start of anesthesia to the time of transport out of the operating room and uploaded every 5 minutes automatically. | 1 |
| Dai et al.25 | 2022 | China | Prospective cohort | Patients receiving general anesthesia | Wireless axillary thermometer; axillary; Core temperature was documented every 5 or 15 minutes throughout the operation. | 0 |
| Kim et al.26 | 2014 | South Korea | Prospective cohort | Abdominal surgery under general anesthesia | Tympanic membrane thermometer; tympanic; measurement of core body temperature on arrival in the operating theatre, at induction of anesthesia, 1h, 2h and 3h after induction of anesthesia. | 3 |

Supplementary table 4. Establishment, validation, predictors, and model performance of hypothermia risk prediction models in perioperative patients (n=11)

| Study | Candidate Variable | Continuous Variable Handling Methods | Sample Size | Incidence of Hypothermia | Missing Data and Handling Methods | | Model Method | Model Performance | Calibration Method | Model Validation | | Model Presentation | Final Predictors(n) |
| --- | --- | --- | --- | --- | --- | --- | --- | --- | --- | --- | --- | --- | --- |
| Number | Handling Methods | Internal Validation | External Validation |
| Rincón et al.16 | 15 | Maintain continuity | A:200  B:64 | A:46.50%  B:— | 36 | Delete directly | LR | A(Complete model):AUC:0.850  Se:83.00%  Sp:73.00%  A(Simplified model):AUC:0.830  Se:84.00%  Sp:73.00%  B(Complete model):AUC:0.850  Se:81.00%  Sp:67.00%  Overall accuracy rate:73.00%  B(Simplified model):AUC:0.820  Se:84.00%  Sp:67.00%  Overall accuracy rate:75.00% | H-L | Random split verification | — | Risk scale | Age, weight, duration of operation, ambient temperature, baseline temperature (5) |
| Yi et al.17 | 13 | Transfer to categorical variables | A:3132  B:830 | A:44.30%  B:39.90% | 0 | — | LR | A:AUC:0.789  Brier score:0.211  H-L:*P*=0.561  B:AUC:0.771 | H-L, Brier score | — | Verified | Equation | Magnitude of surgery, the volume of fluids, duration of anesthesia, warming modes, BMI, ambient temperature, baseline temperature (7) |
| Kasai et al.18 | 7 | Maintain continuity | A:400  B:50 | A:50%  B:— | 462 | Delete directly | LR | A:Se:81.50%  Sp:83.00%  B:— | — | — | Verified | Equation | Age, height, weight, preoperative systolic blood pressure, preoperative heart rate (5) |
| Desgranges et al.19 | 28 | Maintain continuity | A:359  B:— | A:22.56%  B:— | 0 | — | LR | A(model 1)AUC:0.870(95%CI:0.830-0.900)  H-L:*P*=0.990  A(model 2)AUC:0.850(95%CI:0.810-0.880)  H-L:*P*=0.320  B:— | H-L | — | — | Equation | model 1: The volume of fluids, baseline temperature, core temperature at skin incision, warming modes, obesity (5)  model 2: The volume of fluids, baseline temperature, core temperature at skin incision, warming modes, obesity, and use of oxytocin (6) |
| Hu et al.20 | 10 | Maintain continuity | A:833  B:833 | A:41.30%  B:— | 308 | Delete directly | LR | A:AUC:0.850(95%CI:0.830-0.880)  B:— | — | Fivefold cross-validation | — | Nomogram | BMI, baseline core temperature, thoracic surgeries, morning surgeries, duration of surgery (5) |
| Zhao et al.21 | 42 | Maintain continuity | A:512  B:206 | A:53.15%  B:48.06% | 60 | Delete directly | LR | A:AUC:0.867(95%CI:0.836-0.898)  Youden Index= 0.602  Se:79.00%  Sp:81.20%  H-L: *P* =0.676  B:Se:89.90%  Sp:89.72%  Overall accuracy rate:89.81% | H-L | Random split verification | — | Nomogram | Age, preoperative hemoglobin level, postoperative hemoglobin level, intraoperative blood loss, postoperative systolic blood pressure (5) |
| Li et al.22 | 17 | Maintain continuity | A:404  B:99 | A:42.82%  B:43.43% | 0 | — | LR | A:AUC:0.861  Youden Index= 0.530  Se:59.90%  Sp:93.00%  H-L: *P* =0.608  B:H-L:χ2 = 0.012，*P*=0.912  Se:88.37%  Sp:87.50%  Overall accuracy rate:87.88% | H-L | Random split verification | Verified | Equation | Age, intraoperative hypothermia, BMI, heat preservation measures, platelet (5) |
| Zhang et al.23 | 17 | Transfer to categorical variables | A:356  B:150 | A:35.67%  B:32.67% | 41 | Delete directly | LR | A:AUC:0.831(95%CI:0.799-0.863)  B:AUC:0.820  DCA:0.01-0.74 | Calibration curve | Bootstrap method | Verified | Nomogram | Gender, BMI, preoperative body temperature, operation time (4) |
| Yuan et al.24 | 19 | Transfer to categorical variables | A:740  B(internal validation):740  B(external validation):248 | A:27.57%  B(external validation):27.82% | 0 | — | LR | A:AUC:0.773(95%CI:0.735-0.811)  Se:75.00%  Sp:70.50%  Youden Index= 89.819  B(external validation):AUC:0.748(95%CI:0.658-0.838) | H-L, DCA, Calibration curve | Bootstrap method | Verified | Nomogram | Duration of anesthesia, blood loss, preoperative temperature, tumor location, age, mean arterial pressure (6) |
| Dai et al.25 | 23 | Maintain continuity | A:—  B:227 | A:—  B:43.61% | 20 | Delete directly | — | A:—  B:AUC:0.700(95%CI:0.632-0.768)  H-L:χ2 = 13.800，*P* =0.087  Brier score:0.330(95%CI:0.290-0.370) | H-L, Brier score | — | Verified | — | Age, sex, height, weight, American Society of Anesthesiologists physical status, the magnitude of surgery, the mode of anesthesia, the estimated volume of intraoperative intravenous fluid, the estimated volume of irrigation fluid, the estimated duration of anesthesia, minimally invasive surgery, preoperative baseline core temperature, and OR ambient temperature (13) |
| Kim et al.26 | 8 | Maintain continuity | A:147  B:— | A(model 1):34.69%  A(model 2):46.26%  A(model 3):54.42%  B:— | 8 | Delete directly | LR | A(model 1):*R*2=0.658, *P*<0.001  A(model 2):*R*2=0.631, *P*<0.001  A(model 3):*R*2=0.665, *P*<0.001  B:— | H-L | — | — | — | Preoperative baseline temperature, weight, preoperative heart rate, age (4) |

**Abbreviations**: A:model build；B:model verify；—:not reported；Se: sensitivity；Sp: specificity；LR: logistic regression；AUC: area under the curve；H-L: Hosmer-Lemeshow test；DCA: decision curve analysis；*R*2, coefficient of determination.

Supplementary table 5. Evaluation of the risk of bias and applicability of included studies (n=11)

| Study | Risk of Bias | | | | Applicability | | | Overall | |
| --- | --- | --- | --- | --- | --- | --- | --- | --- | --- |
| Participants | Predictors | Outcome | Analysis | Participants | Predictors | Outcome | Risk of Bias | Applicability |
| Rincón et al.16 | + | - | ？ | - | + | + | + | - | + |
| Yi et al.917 | - | ？ | ？ | - | + | + | + | - | + |
| Kasai et al.18 | - | ？ | ？ | - | + | + | + | - | + |
| Desgranges et al.19 | + | + | + | - | + | + | + | - | + |
| Hu et al.20 | - | ？ | ？ | - | + | + | + | - | + |
| Zhao et al.21 | + | + | ？ | - | - | + | + | - | - |
| Li et al.22 | + | + | ？ | - | + | + | + | - | + |
| Zhang et al.23 | - | ？ | ？ | - | + | + | + | - | + |
| Yuan et al.24 | - | ？ | ？ | - | - | + | + | - | - |
| Dai et al.25 | + | + | ？ | - | + | + | + | - | + |
| Kim et al.26 | + | + | + | - | + | + | + | - | + |

+ Indicates low risk of bias or high concern regarding applicability, - indicates high risk of bias or low concern regarding applicability, and ? indicates unclear risk of bias or unclear concern regarding applicability.
